# Supplementary material for: chaoptin, prominin, eyes shut and crumbs form a genetic network controlling the apical compartment of Drosophila photoreceptor cells
Source: PubMed Central journal article supplement (PMC4021355; doi:10.1242/bio.20147310), 2014-04-04
Supplement: supp_bio.20147310_bio.20147310-s1.pdf [file supp_bio.20147310_bio.20147310-s1.pdf]

Supplementary Material

Nagananda Gurudev et al. doi: 10.1242/bio.20147310

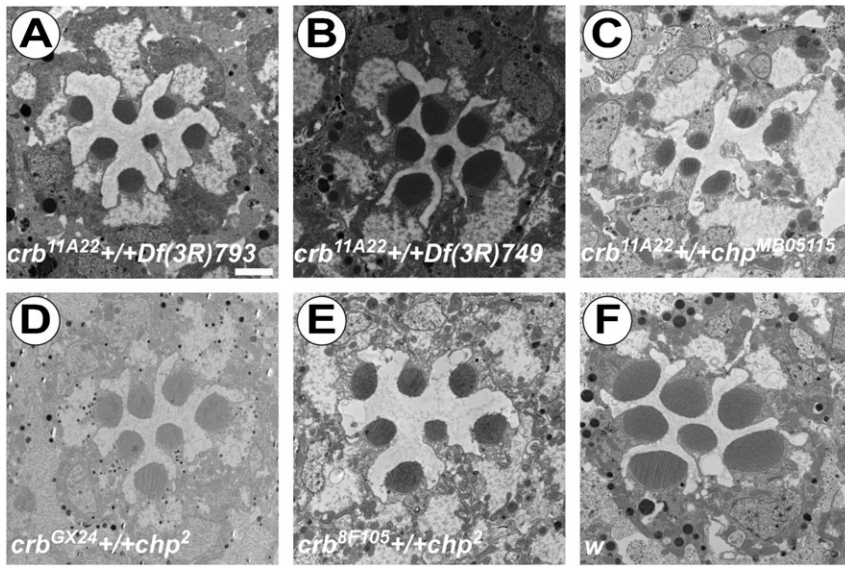

**Fig. S1. Genetic interactions between different *crb* and *chp* mutant alleles.** Electron micrographs of cross-sections of *w*; *crb*<sup>11A22</sup>+/+ *Df(3R)BSC793* (A), *w*; *crb*<sup>11A22</sup>+/+ *Df(3R)BSC749* (B), *w*; *crb*<sup>11A22</sup>+/+ *chp*<sup>MB05115</sup> (C) *w*; *crb*<sup>GX24</sup>+/+ *chp*<sup>2</sup> (D), *w*; *crb*<sup>8F105</sup>+/+ *chp*<sup>2</sup> (E) and *w* (F) adult ommatidia. Scale bar: 1 μm.

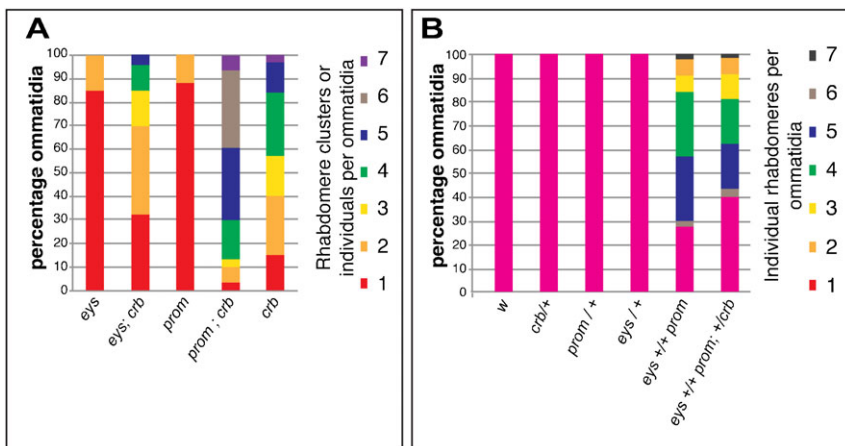

**Fig. S2. Quantification of interrhabdomeral adhesion in different mutant backgrounds.** Graphs showing quantification of individual rhabdomeres or rhabdomere clusters per ommatidium in *w*; *eys cn bw*, *w*; *eys cn bw*; *crb*<sup>11A22</sup>, *w*; *cn bw prom*, *w*; *cn bw prom*; *crb*<sup>11A22</sup>, *crb*<sup>11A22</sup> (A) and *w*, *w*; *eys cn bw/+*, *w*; *cn bw prom/+*, *w*; *+*; *+*; *crb*<sup>11A22/+</sup>, *w*; *eys cn bw +/+ cn bw prom*, *w*; *eys cn bw +/+ cn bw prom*; *crb*<sup>11A22/+</sup> (B). *n* = number of ommatidia, *n*>30 (A); *n*>50 (B).

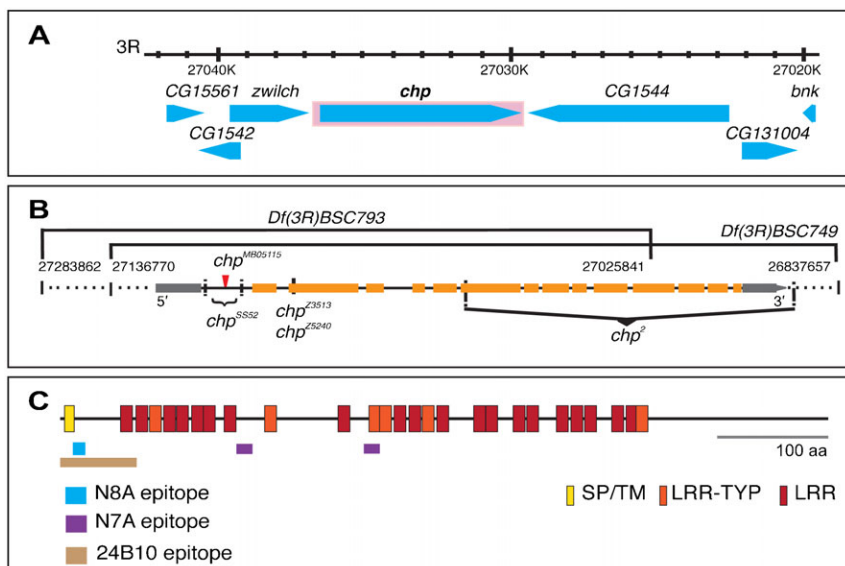

**Fig. S3. Genomic organization and encoded putative protein domains of the *chp* gene.** (A) Physical map of the *chp* locus on the right arm of the 3<sup>rd</sup> chromosome. Distal is left. (B) Mapped genetic lesions in the *chp* locus, here projected onto one of the five predicted transcripts, *chp*-RA. Refer to supplementary material Table S1 for details on various *chp* mutant alleles used in this study. (C) SMART annotation for Chp-PA. Localisation of epitopes used to raise Chp antibodies are indicated by blue, magenta and brown bars. Blue: N8A (Yano et al., 2012); magenta: N7A (this study) and brown: 24B10 (Zipursky et al., 1984). SP: signal peptide; TM: transmembrane domain; LRR-TYP: Leucine Rich Repeat-Typical domain and LRR: Leucine Rich Repeat domain.

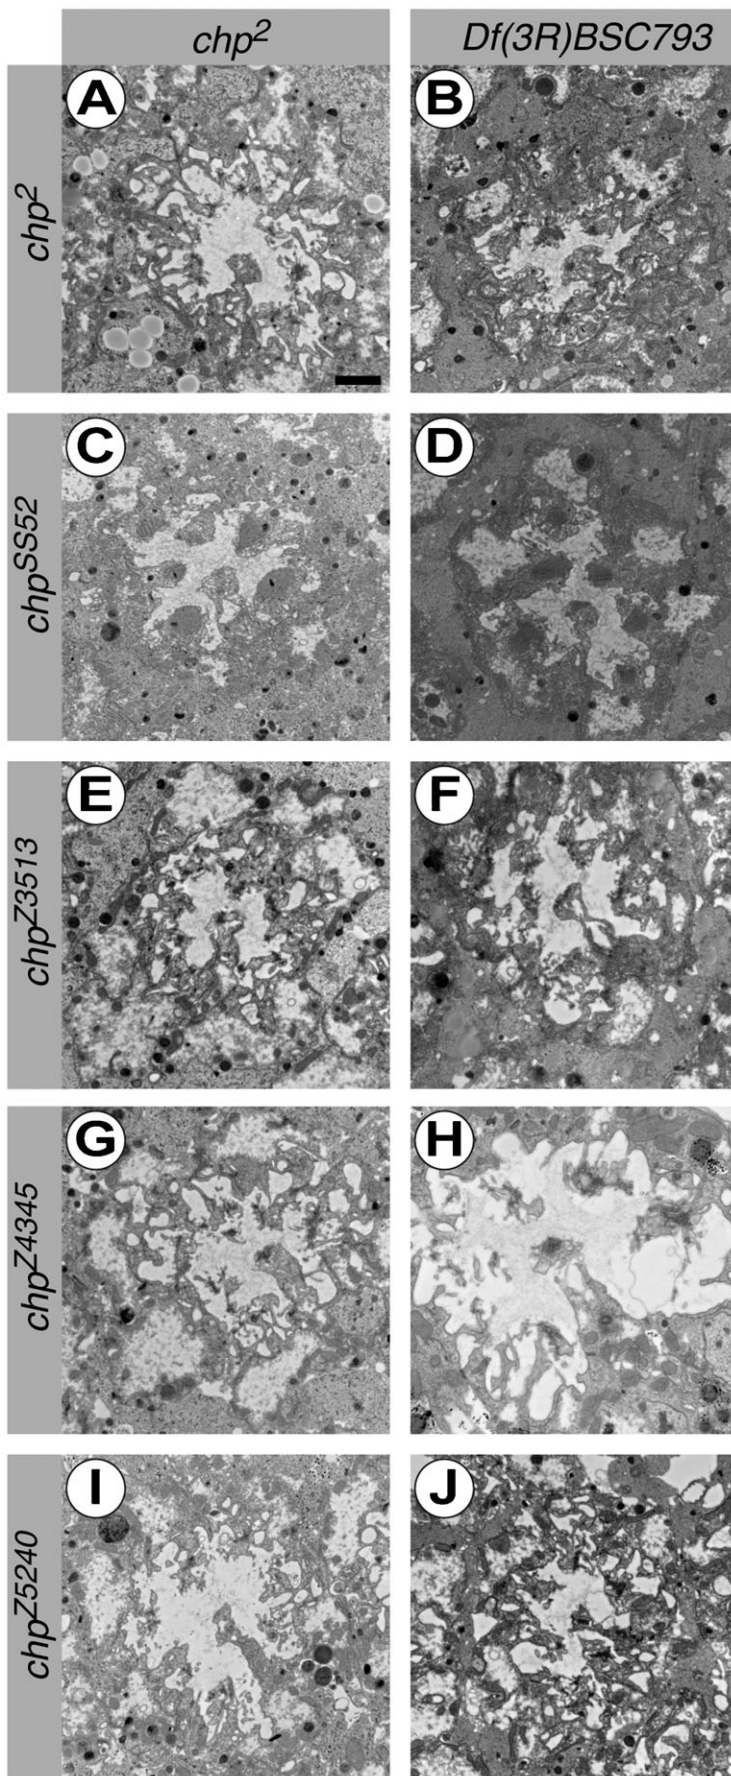

**Fig. S4. Phenotype of different *chp* alleles in heteroallelic combinations.** Electron micrographs showing tangential distal sections through various *chp* alleles in trans over *chp*<sup>2</sup> (A,C,E,G,I) and over a genomic deficiency (B,D,F,H,J). Scale bar: 1  $\mu$ m.

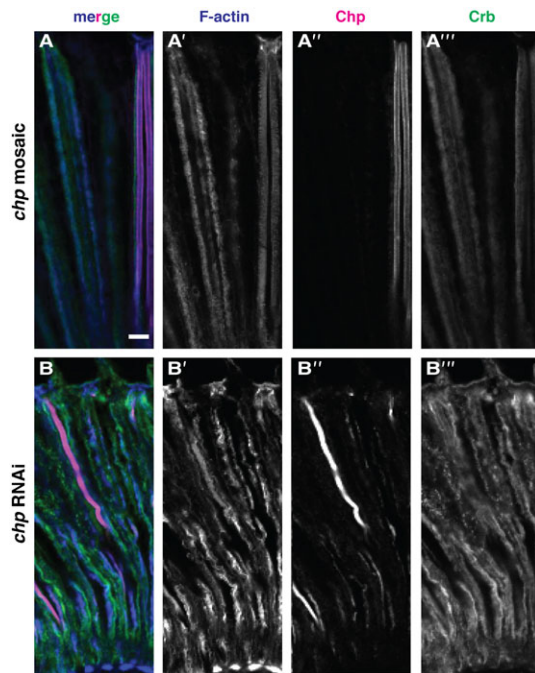

**Fig. S5. Chp affects localization of Crumbs in adult PRCs.** Confocal images of longitudinal sections through *chp<sup>2</sup> mosaic* (A) and *elav-GAL4>chp-RNAi* (B) ommatidia stained for F-actin (blue), Chp (magenta) and Crb (green). The rudimentary rhabdomeres span the entire retina and show non-uniform F-actin and fuzzy Crb distribution on the apical surface. Scale bar: 5  $\mu$ m.

**Table S1. List of *chp* alleles used**

| Allele (reference)                                              | Mutagen                    | Genetic lesion                                                                  | Phenotype                                                                                                                                              |
|-----------------------------------------------------------------|----------------------------|---------------------------------------------------------------------------------|--------------------------------------------------------------------------------------------------------------------------------------------------------|
| <i>chp<sup>2</sup></i> (Van Vactor et al., 1988)                | X-ray                      | Truncation, exon 6 to 3' (Van Vactor et al., 1988; this study)                  | Amorph; rudimentary rhabdomeres, no Chp protein detected by immunohistochemistry and western blot                                                      |
| <i>chp<sup>Z3513</sup></i> (Sanxaridis and Tsunoda, 2010)       | EMS                        | 11 bp deletion in exon 3 (this study)                                           | Hypomorph; Chp misdistributed                                                                                                                          |
| <i>chp<sup>Z5240</sup></i> (Sanxaridis and Tsunoda, 2010)       | EMS                        | 11 bp deletion in exon 3 (this study)                                           | Not determined, homozygous lethal                                                                                                                      |
| <i>chp<sup>Z4345</sup></i> (Sanxaridis and Tsunoda, 2010)       | EMS                        | No mutation detected within introns and exons (this study)                      | Hypomorph, Chp misdistributed                                                                                                                          |
| <i>chp<sup>MB05115</sup></i> (FlyBase; Venken and Bellen, 2007) | Minos-transposon insertion | Minos transposon inserted into the first intron (3R:27035655;27035655, Flybase) | Hypomorph, phenotype stronger in R7                                                                                                                    |
| <i>chp<sup>SS52</sup></i> (this study)                          | Minos-transposase          | Deletion within the first intron                                                | Hypomorph, Chp protein misdistributed, phenotype stronger in R7 in trans over, deficiency R7 phenotype is stronger than <i>chp<sup>2</sup></i> , R1–R6 |
| <i>Df(3R)BSC793</i> (FlyBase; Cook et al., 2012)                | FLP-recombinase            | Chromosomal deletion, 3R:26837657;27136770                                      | Not determined, homozygous lethal                                                                                                                      |
| <i>Df(3R)BSC749</i> (FlyBase; Cook et al., 2012)                | FLP-recombinase            | Chromosomal deletion, 3R:27025841;27283862                                      | Not determined, homozygous lethal                                                                                                                      |

*chp<sup>MB05115</sup>* is a mutation induced by the insertion of a *minos*-element in the first intron (Flybase). *chp<sup>SS52</sup>*, which was obtained by transposase-induced imprecise excision of the *minos*-element in *chp<sup>MB05115</sup>* (see Materials and Methods), is a hypomorphic allele, which severely affects R7 (supplementary material Fig. S3C,D). Its phenotype seems to be slightly stronger than that of the original insertion line. *chp<sup>Z3513</sup>*, *chp<sup>Z5240</sup>* and *chp<sup>Z4345</sup>* are EMS (ethylmethanesulfonate)-induced alleles from the Zuker collection (Koundakjian et al., 2004), which have been identified as *chp* alleles (Sanxaridis and Tsunoda, 2010). *chp<sup>Z3513</sup>* and *chp<sup>Z5240</sup>* carry the same 11 bp deletion in exon 3 (supplementary material Fig. S2B), which results in a frameshift and a premature stop codon after another 80 unrelated amino acids. No sequence change could be detected in the intron and exon regions of *chp<sup>Z4345</sup>*. The phenotype of these three alleles in trans over *chp<sup>2</sup>* or a genomic deletion is as strong as that of *chp<sup>2</sup>*, suggesting that they are complete loss of function alleles (supplementary material Fig. S3).
